# Supplementary material for: Analysis of functional groups in atmospheric aerosols by infrared spectroscopy: method development for probabilistic modeling of organic carbon and organic matter concentrations
Source: Copernicus journal article supplement (doi:10.5194/amt-13-1517-2020), 2020-03-31
Supplement: Supplementary file 1 [file amt-13-1517-2020-supplement.pdf]

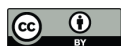

## *Supplement of*

# **Analysis of functional groups in atmospheric aerosols by infrared spectroscopy: method development for probabilistic modeling of organic carbon and organic matter concentrations**

**Charlotte Bürki et al.**

*Correspondence to:* Satoshi Takahama ([satoshi.takahama@epfl.ch](mailto:satoshi.takahama@epfl.ch))

The copyright of individual parts of the supplement might differ from the CC BY 4.0 License.

---

**Contents**

|                                                            |            |
|------------------------------------------------------------|------------|
| <b>S1 Prior distributions</b>                              | <b>S1</b>  |
| <b>S2 Contributions to the log-likelihood</b>              | <b>S4</b>  |
| <b>S3 Cluster analysis</b>                                 | <b>S5</b>  |
| <b>S4 Posterior predictions</b>                            | <b>S11</b> |
| <b>S5 Spatial and temporal prevalence of cluster types</b> | <b>S14</b> |

---

## S1 Prior distributions

This section includes Figures S1–S4; and Table S1.

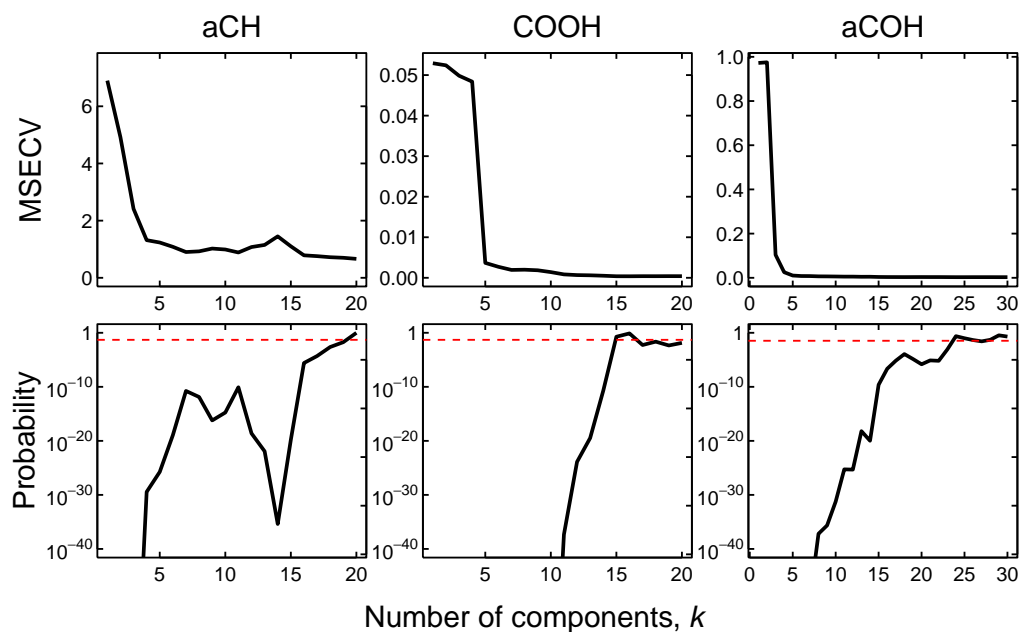

**Figure S1.** MSEC curves (in units of  $\mu\text{mole}$  of FG, top row) and resulting prior probability distributions for  $k$  (bottom row). Horizontal lines in bottom row correspond to probability for a uniform distribution over the selected number of components.

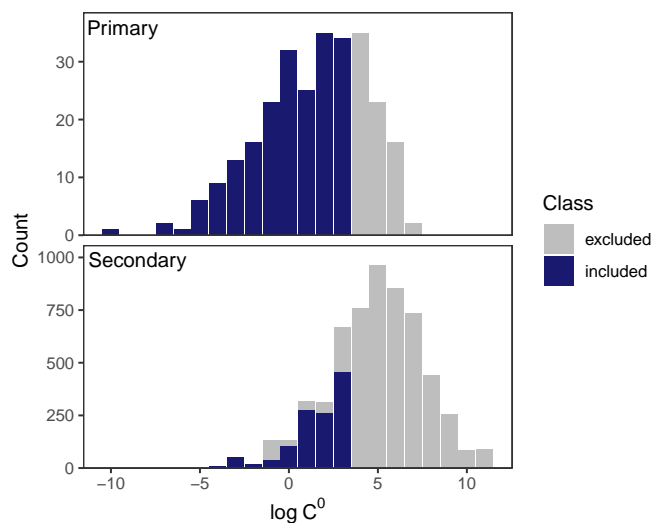

**Figure S2.** Distribution of equilibrium vapor concentrations  $C^0$  ( $\mu\text{g m}^{-3}$ ) for molecules taken from Rogge et al. (1993) and Rogge et al. (1998) ("Primary") and the MCM v3.3.1 database (Jenkin et al., 1997; Saunders et al., 2003) ("Secondary"). Only non-radical molecules with  $C^0 \leq 10^{3.5} \mu\text{g m}^{-3}$  are used in this study (excluded molecules below this threshold in the "Secondary" category represent radical species).

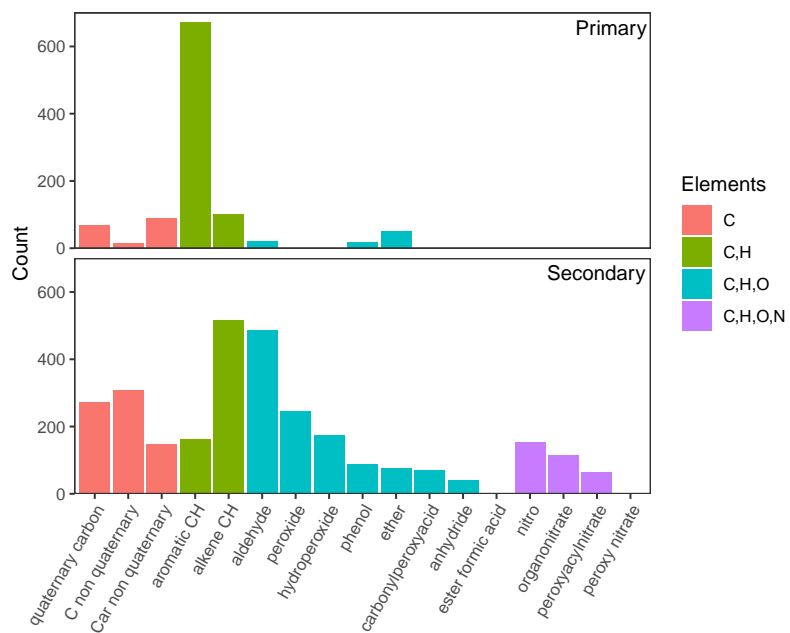

**Figure S3.** Number of molecular structures associated with undetected carbon atoms for all semivolatile compounds selected in Figure S2. Structures are colored by the elements that they contain. Structure names are described with illustrations in Table 1 of technical note by Ruggeri and Takahama (2016).

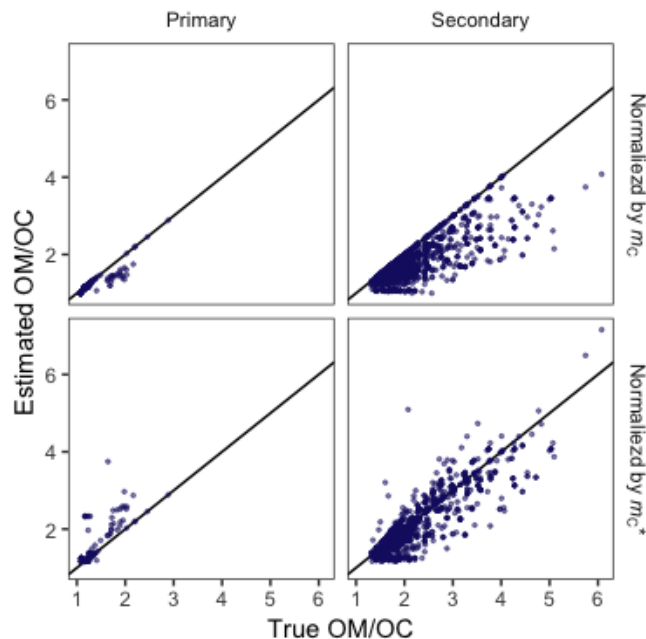

**Figure S4.** Estimates of OM/OC when normalized by  $m_C$  and  $\alpha m_C$ . Secondary aerosol species contain many small but highly functional molecules, but the overall mode of the true OM/OC distribution is 1.96; the mode for primary aerosol species is 1.17.

**Table S1.** Average number of atoms attached to each type of bond assumed for various types of mixtures.  $\lambda_{C,COOH} = \lambda_{C,carbonyl} = 1$ . Table adapted from Takahama and Ruggeri (2017).

| Study                         | Mixture type         | $\lambda_{C,CH}$ | $\lambda_{C,aCOH}$ |
|-------------------------------|----------------------|------------------|--------------------|
| Allen et al. (1994)           | ambient              | 0.5              |                    |
| Russell (2003)                | ambient              | 0.5              | 1                  |
| Reff et al. (2007)            | indoor/ambient       | 0.48             |                    |
| Chhabra et al. (2011)         | $\alpha$ -pinene SOA | 0.63             | 0.63               |
|                               | guaiacol SOA         | 0.88             | 0.88               |
| Russell and co-workers*       | ambient              | 0.5              | 0.5                |
| Ruthenburg et al. (2014)      | ambient              | 0.5              | 0                  |
| Takahama and Ruggeri (2017)** | $\alpha$ -pinene SOA | 0.39–0.5         | 0.09–0.52          |

\*reflects assumptions by Russell et al. (2009), Liu et al. (2009), and Day et al. (2010).

\*\*estimated from simulated molecular mixtures.

## S2 Contributions to the log-likelihood

- In this section we outline calculations for assessing contribution of individual samples to the likelihood function (eq. 6). Let  $r = (y - m_C)/\sigma$  represent the model residual normalized by the measurement precision. The contribution from a single sample to the overall likelihood  $p(y|\theta) = \prod_{i \in \mathcal{S}} f_i$  is given by:

$$f_i = \left( \frac{1}{2\pi\sigma_i^2} \right)^{1/2} \exp \left[ -\frac{1}{2} r_i^2 \right]$$

Isolines of  $\ln(f)$  (dropping the subscript  $i$ ) can be generated (Figure S5) for several combinations of  $\sigma$  and  $r$ :

$$\ln f = -\frac{1}{2} [\ln(2\pi) + 2\ln(\sigma) + r^2] . \quad (\text{S1})$$

- 10 This quantity gives an indication for the magnitude of contribution by individual data point (with uncertainty  $\sigma$  and relative deviation  $r$ ) to the overall log-likelihood. For example, a sample near the detection limit ( $m_C \sim 3\sigma_0$ ) compared to one at the limit of quantification ( $m_C \sim 10\sigma_0$ ) means  $\sigma = \sigma_0(1 + 3^2\kappa^2)^{1/2}$  and  $\sigma_0(1 + 10^2\kappa^2)^{1/2}$ , respectively, from our heteroscedastic error model (eq. 7). For identical  $r$ , the  $\sigma$  contribution of the higher concentration sample to  $\ln f$  is  $\sim 80\%$  of the lower one for  $\sigma_0 = 0.37 \mu\text{g cm}^{-2}$  and  $\kappa = 0.07$  (Section 3.2) but decreases to  $\sim 25\%$  for  $\kappa = 0.3$ .

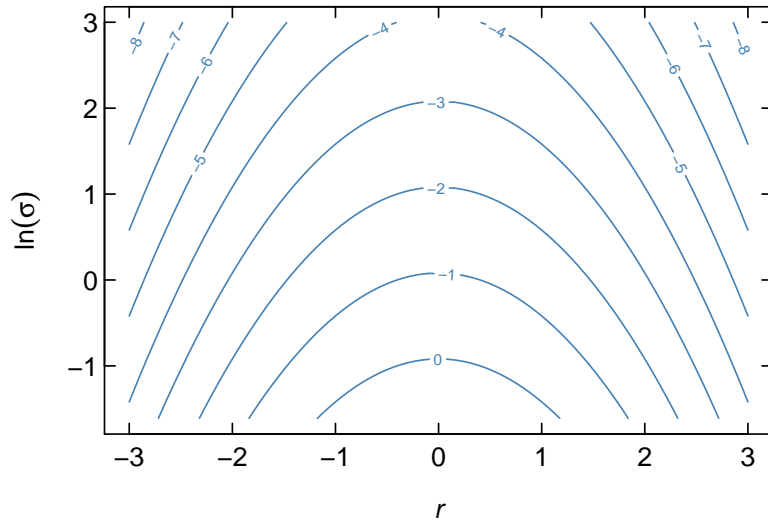

**Figure S5.** Isolines of  $\ln f$  according to eq. S1.

### 15 S3 Cluster analysis

Hierarchical cluster analysis (Bishop, 2009; Hastie et al., 2009) is used to categorize samples into spectroscopically similar groups (Russell et al., 2009; Liu et al., 2009; Ruthenburg et al., 2014). Spectra are first preprocessed by baseline correction (Kuzmiakova et al., 2016) and wavenumber selection (retaining only regions in the range 3700–2500  $\text{cm}^{-1}$  and 1820–1500  $\text{cm}^{-1}$ ) to reduce the influence of substrate interference, particle scattering, and (carbon dioxide and water) vapors in the analysis chamber (Russell et al., 2009). The spectra are then normalized by their respective L2 norms (i.e., Euclidean distances from the origin when spectra are represented as vectors) so that they vary by composition rather than absolute absorbance (which includes the effect of mass loading in addition to composition). Finally, more than 1000 wavenumbers of the normalized spectra matrix are reduced to 9 dimensions using mean-centered, unscaled principal component analysis. These 9 principal components are selected from the eigenvalue profile (“scree plot”) and their capability to explain 99% of the variance of the original spectra matrix. While instrumental noise does not contribute much to the overall signal (Debus et al., 2019), this preprocessing step additionally reduces the remaining water vapor contribution to the signal that is visible in spectra with low mass loadings, and makes distance metrics used for characterizing similarity more meaningful than what can be obtained in higher dimensions of correlated variables (Domingos, 2012).

The Euclidean distance metric with complete linkage is used for clustering samples based on their principal component scores. The number of clusters is heuristically selected by examining how the overall variability is reduced within each cluster (using the within sum-of-squares metric), and how well individual samples are served by the algorithmically-determined associations (with the Silhouette coefficient) with the creation of each additional cluster (Figure S6). Eleven superclusters are selected from this procedure, and model parameters  $\theta$  estimated for each cluster and applied every member within it to predict FG-OC and FG-OM. As low signal-to-noise ratio samples can adversely affect the operations involving normalized spectra (i.e., principal component and cluster analyses), 10% of samples with the lowest L2 norms are initially excluded in the procedure above, but are assigned to the most appropriate cluster through  $k$ -nearest neighbor ( $k$ -NN) classification in the principal component space a posteriori for completeness.

This section includes Figures S6– S9.

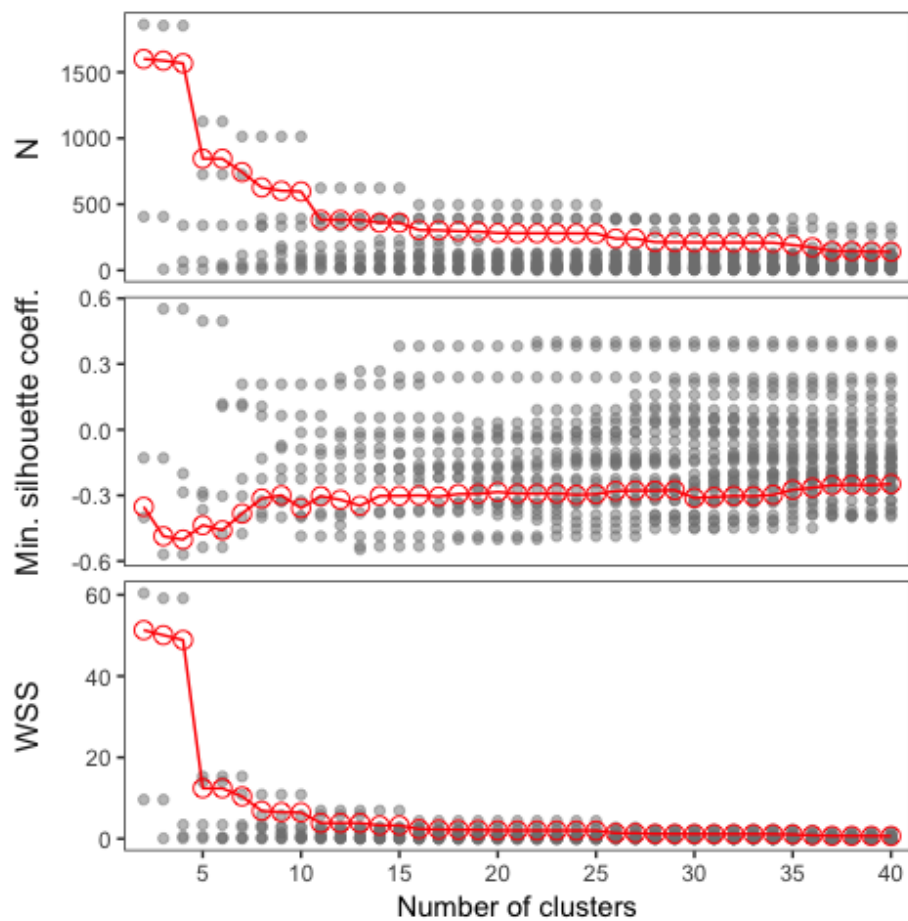

**Figure S6.** Number of samples in each cluster, minimum silhouette coefficient, and within sum-of-squares of each cluster as a function of the number of clusters formed. Gray points represent individual clusters, and red points and lines are values averaged across clusters.



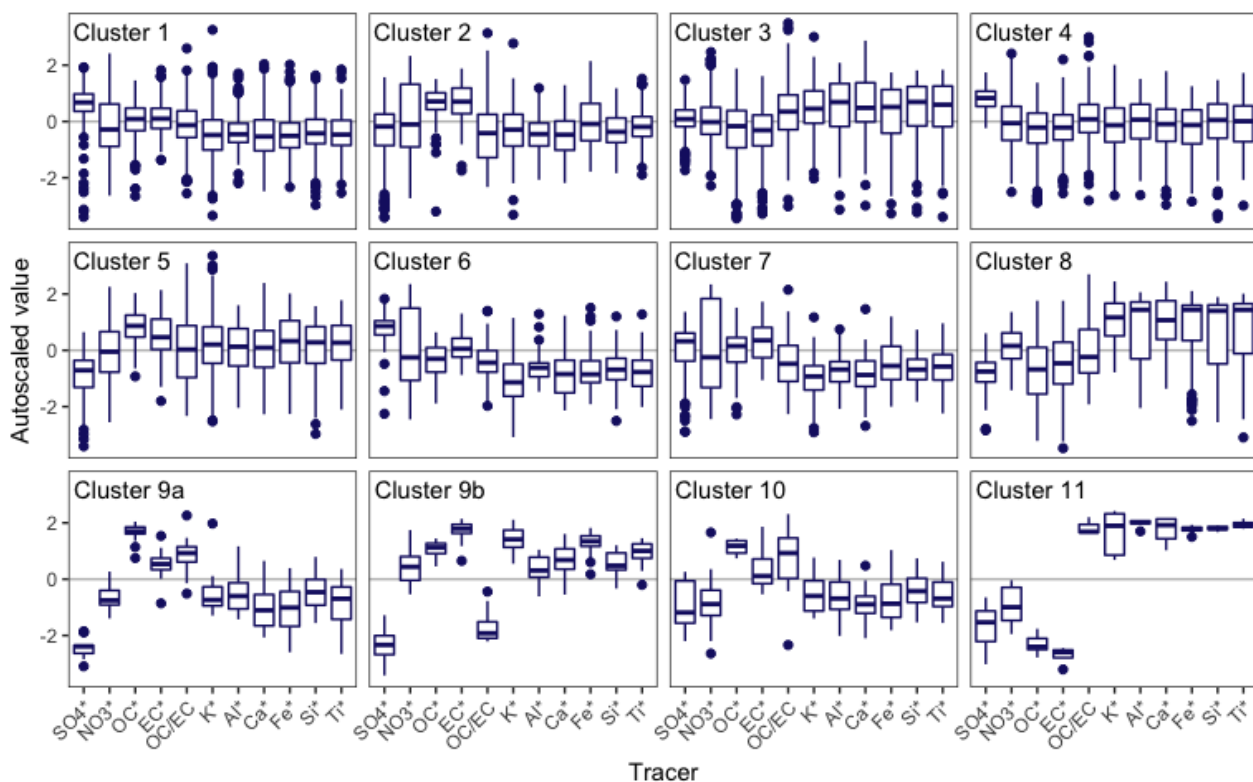

**Figure S7.** Comparisons of relative tracer concentrations. “\*” denotes PM<sub>2.5</sub>-normalized quantities. Normalized values are first logarithmically-transformed to be approximately symmetric, and then autoscaled (mean-centered and normalized by standard deviation of the variable for the entire data set). Values greater than zero for a particular cluster indicates that this substance or ratio is enriched in samples belonging to this cluster, relative to the rest of the samples.

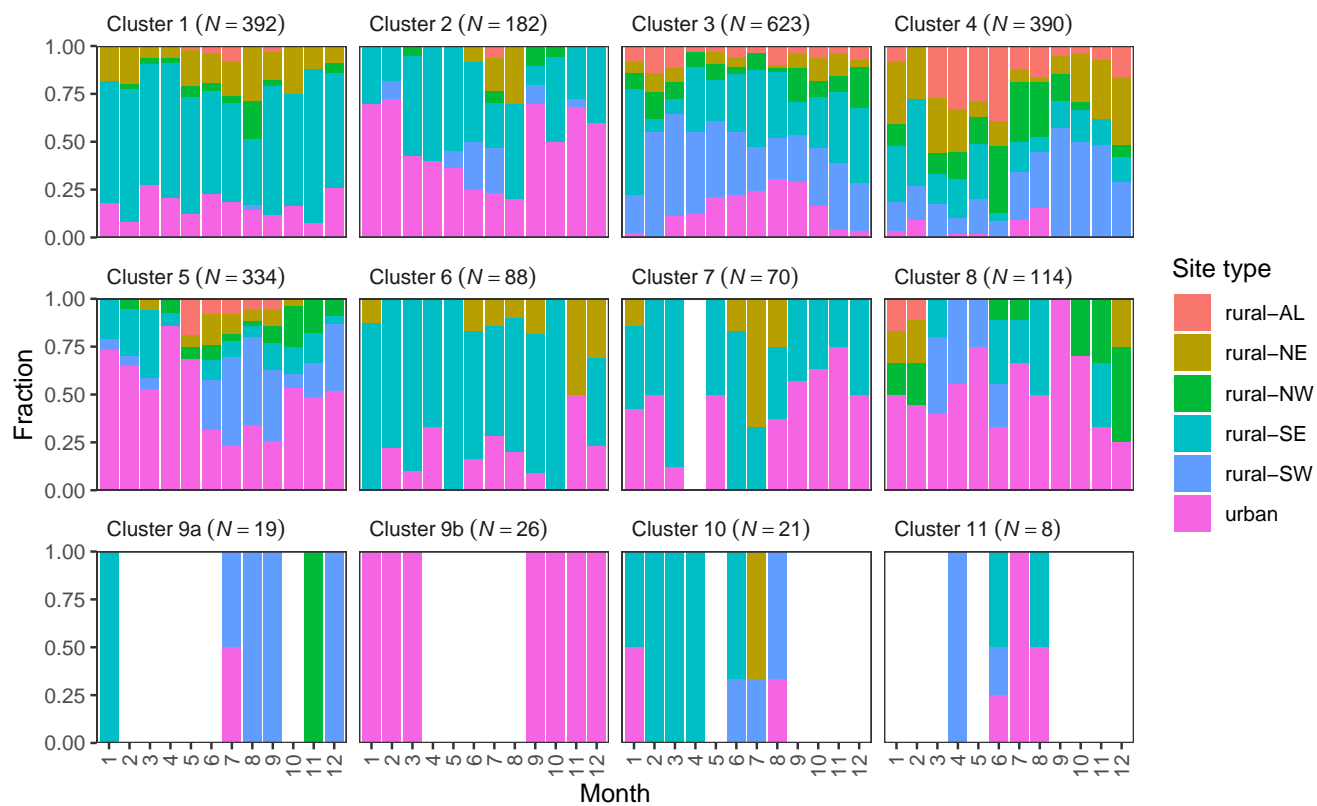

**Figure S8.** Composition of clusters.

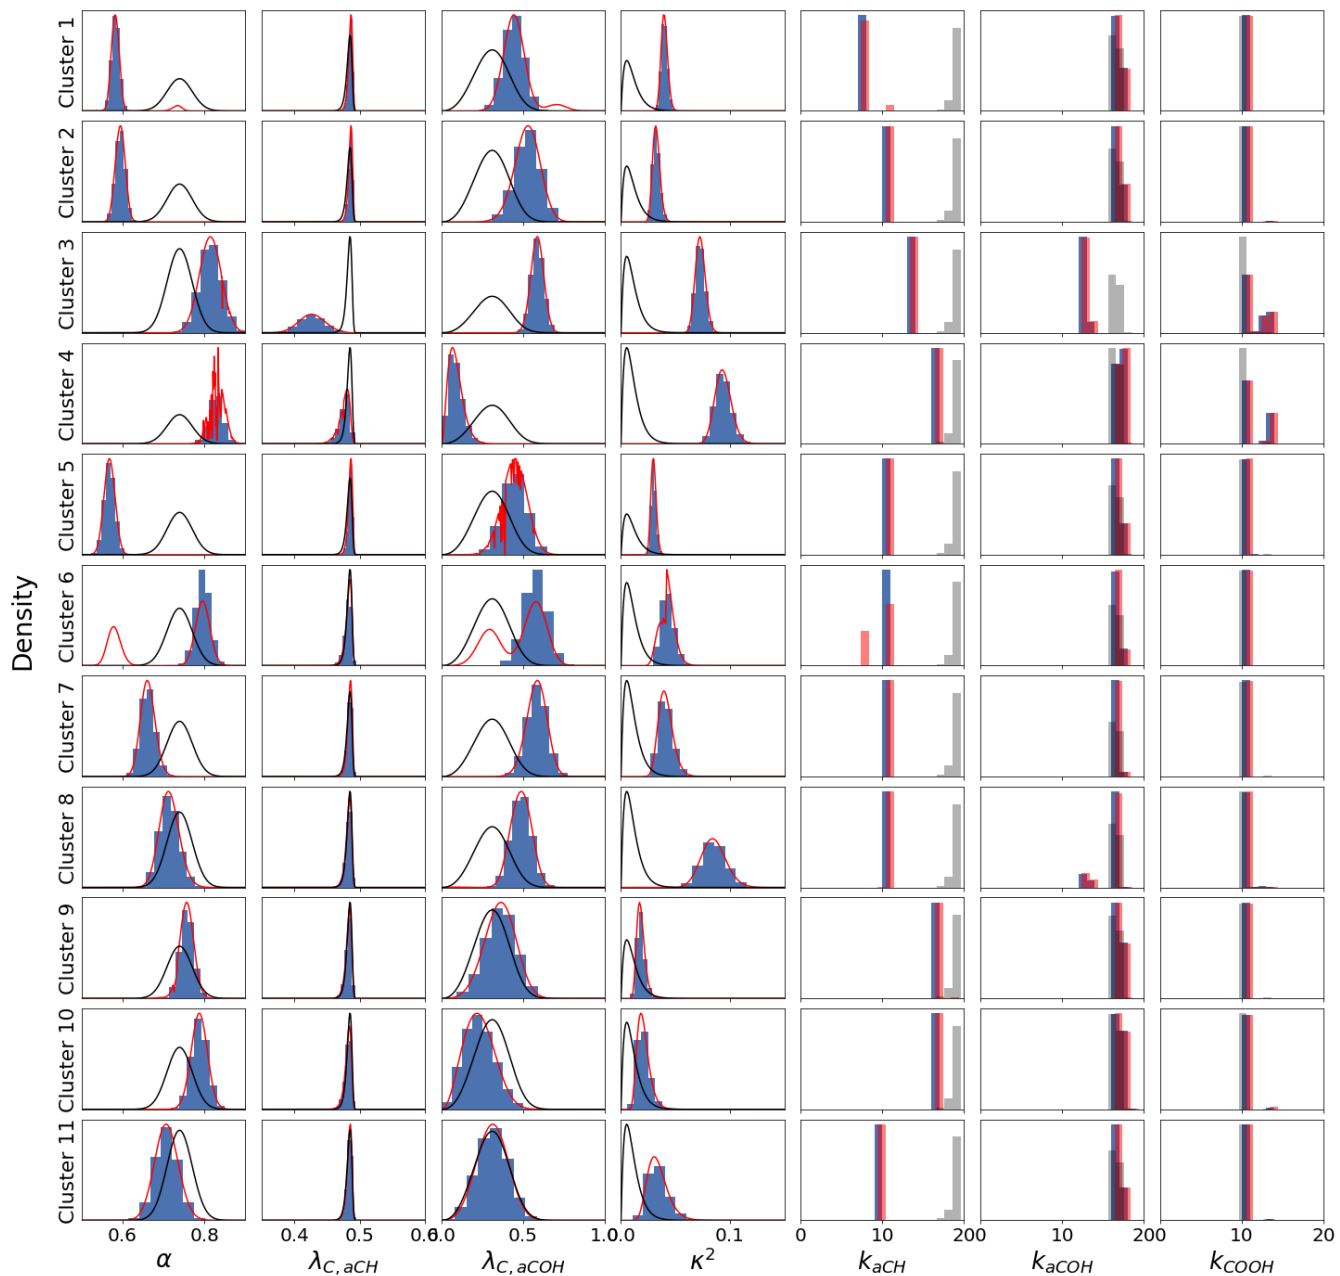

**Figure S9.** Posterior distributions of parameters for each cluster from MCMC (blue histograms) and L-BFGS-B (red lines) compared to prior distributions (black lines).

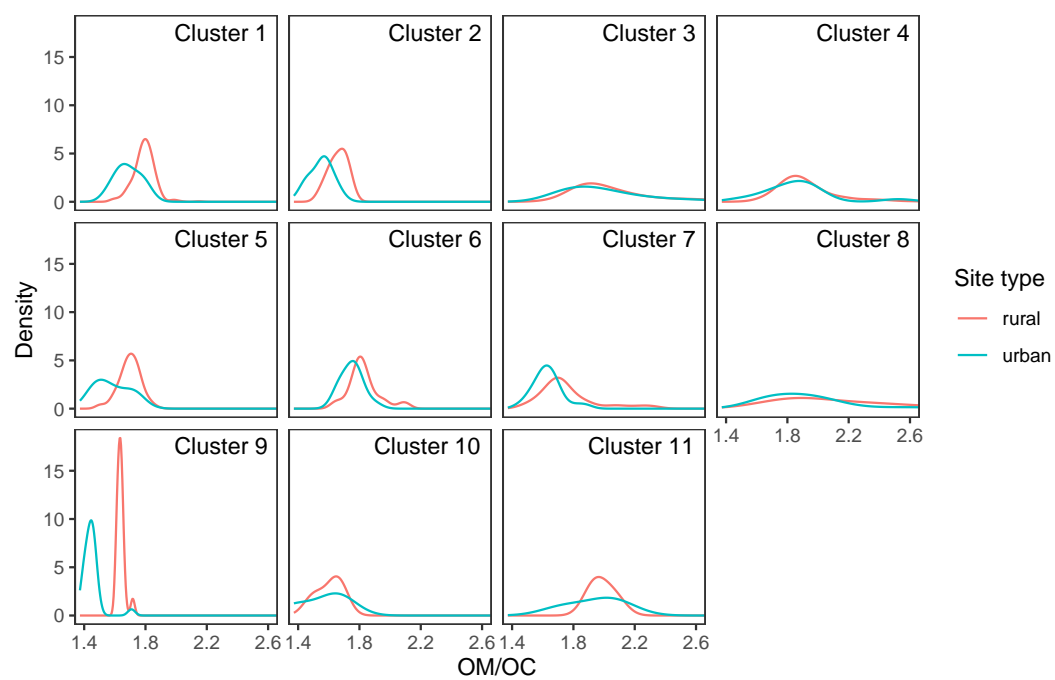

**Figure S10.** Probability distributions of OM/OC ratios segregated by site type.

## S4 Posterior predictions

- 40 After obtaining the posterior parameter distributions, probability distributions and intervals of predictions of the target variable  $y$  are obtained for model checking (Robert, 2007; Vehtari and Ojanen, 2012; Gelman et al., 2013). The posterior predictive distribution for new  $\tilde{y}$  from spectrum  $\tilde{x}$  is given by

$$p(\tilde{y}|y) = \int_{\theta} p(\tilde{y}|\theta)p(\theta|y)d\theta . \quad (\text{S2})$$

- For model checking,  $\tilde{y}$  corresponds to replications of the data used for fitting; the integral in eq. S2 can be numerically evaluated using the values of  $\theta$  generated from MCMC. The expected value of this posterior distribution corresponds to  $m_C$  (eq. 5). While  $m_C$  is uniquely determined for a given realization of  $\theta$ ,  $\varepsilon$  and therefore  $\tilde{y}$  varies according to the sample drawn from a normal distribution characterized with the value of  $\kappa^2$ . The posterior predictive distribution is generally symmetric, and the mode or mean of  $\tilde{y}$  can simply be approximated by the mode or mean of the posterior parameter distributions (Figure S11).

- More generally, for any scalar-valued property  $z$  (e.g.,  $m_C$  or OM/OC) dependent on  $\psi = \theta \setminus \{\kappa^2\}$ ,  $p(z|y)$  and its corresponding central estimate or intervals can also be constructed by transforming the Markov sequence of the parameters:  $\{z(\psi^{[1]}), z(\psi^{[2]}), \dots, z(\psi^{[n]})\}$  (Hoff, 2009). In applying this strategy toward the calculation of OM/OC ratios, we obtain posterior probability distributions for each sample. Due to the nonzero probabilities of several discrete values of  $k_{\text{aCOH}}$  and  $k_{\text{COOH}}$ , OM/OC estimates can become multimodal when contributions from these oxygenated FGs are substantial (examples shown in Figure S12). We find that the median or peak of the largest mode of the posterior distribution of OM/OC is well-approximated by the maximum a posteriori estimate (MAP; Section D) of the parameters (slope and correlation coefficient of 1.0) and so we report this value as the single-point estimate of OM/OC for each sample. The span of 95% prediction intervals (representing uncertainties in sample-specific OM/OC values due to uncertainties in FG-OC model parameters) generally corresponds to less than 6% the reported OM/OC for most samples, except for clusters 8 and 11 where many samples had interval spans extending up to 20 and 10% of the value of the mode, respectively. Cluster 8 had larger intervals due to the two noncontiguous sets of  $k_{\text{aCOH}}$  with substantial probabilities, leading to separation in the modes of OM/OC. In such instances these samples, may benefit from further disaggregation for parameter estimation or incorporation of observations more specific toward the oxygenated fraction to reduce posterior parameter uncertainties. The high uncertainty in prediction for samples in cluster 11 is due to the small number ( $N = 8$ ) samples in this cluster, resulting in broad posterior parameter distributions. Hierarchical Bayesian modeling (Gelman and Hill, 2007) may be beneficial in leveraging relationship of small subgroups of samples to the greater population to better handle such cases.

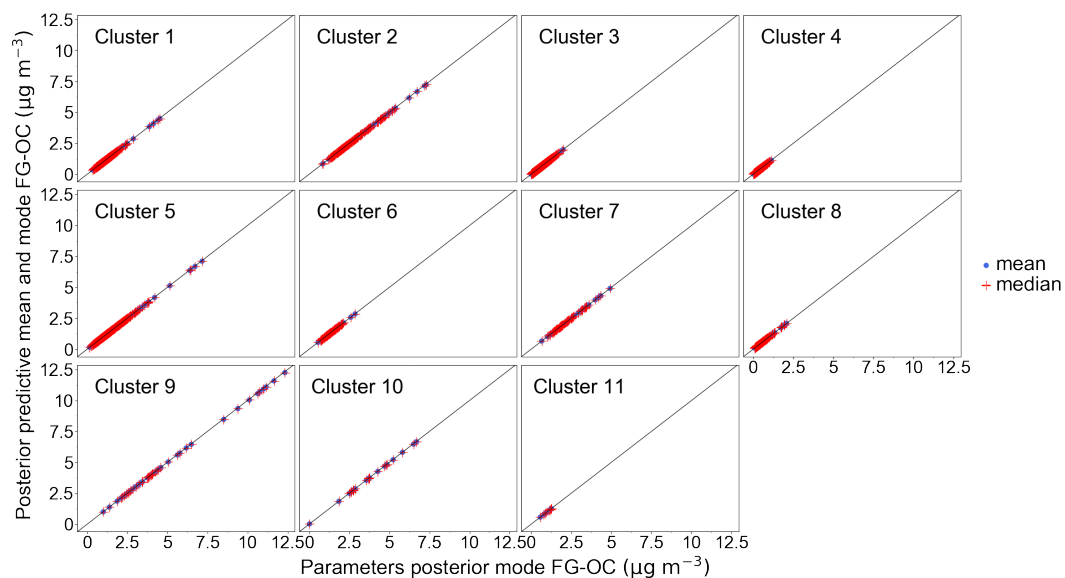

**Figure S11.** Comparison of central values of the posterior predictive distribution with predictions from single-point estimates of parameters obtained from their respective distributions.

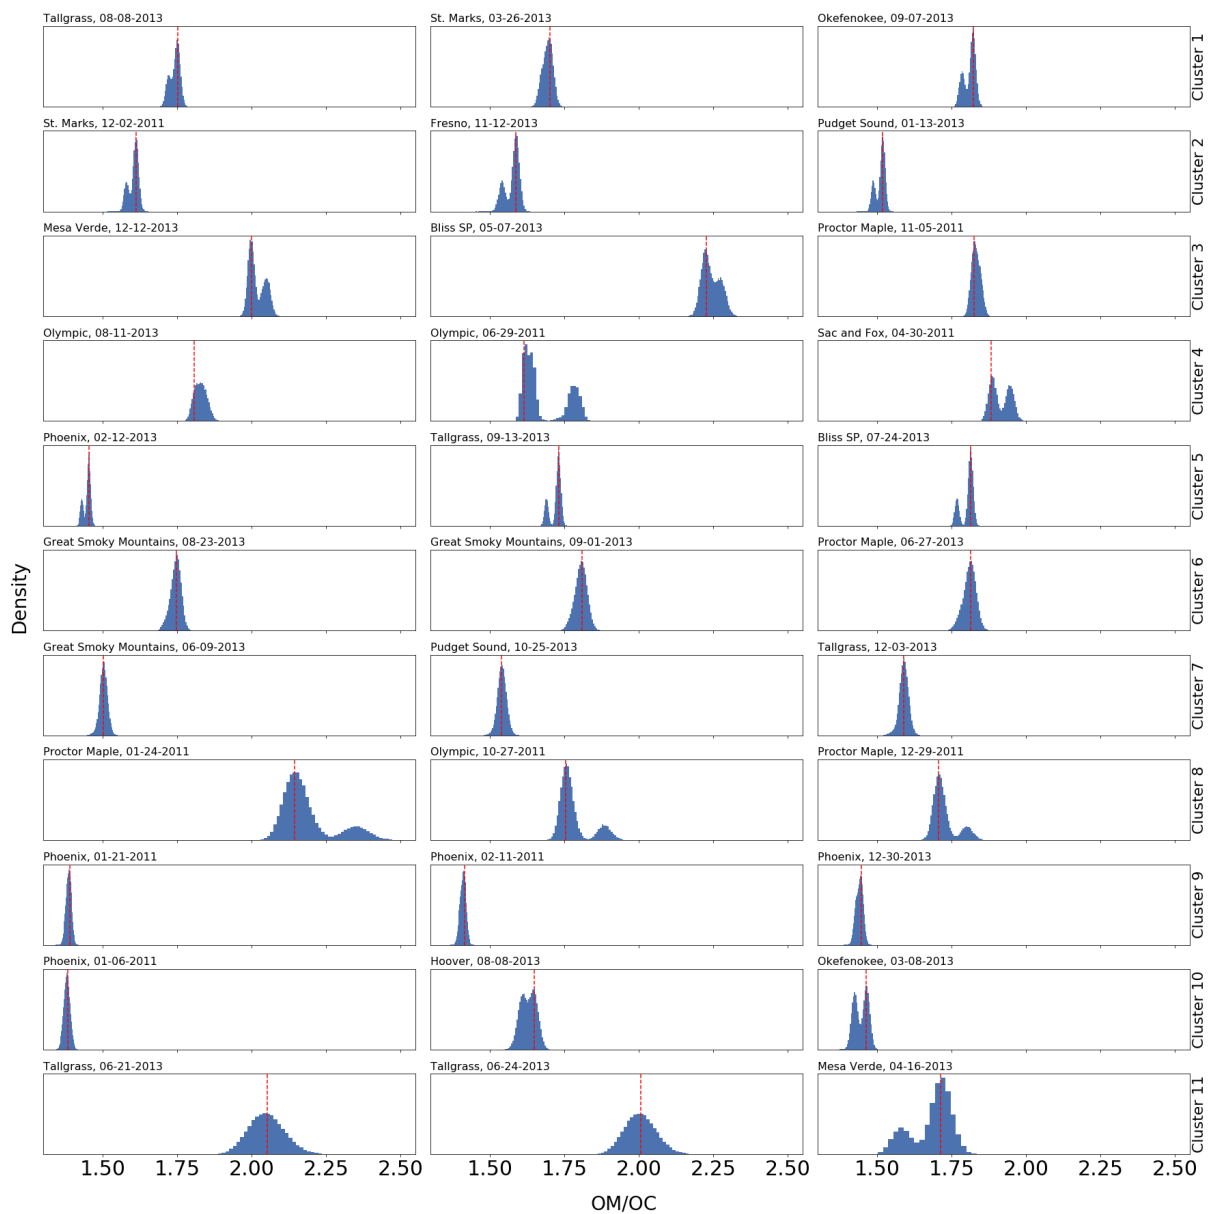

**Figure S12.** Posterior distributions for OM/OC. Red vertical lines indicate the reported value using MAP estimates of the parameters.

S5 Spatial and temporal prevalence of cluster types

This section includes Figures S13 and S14.

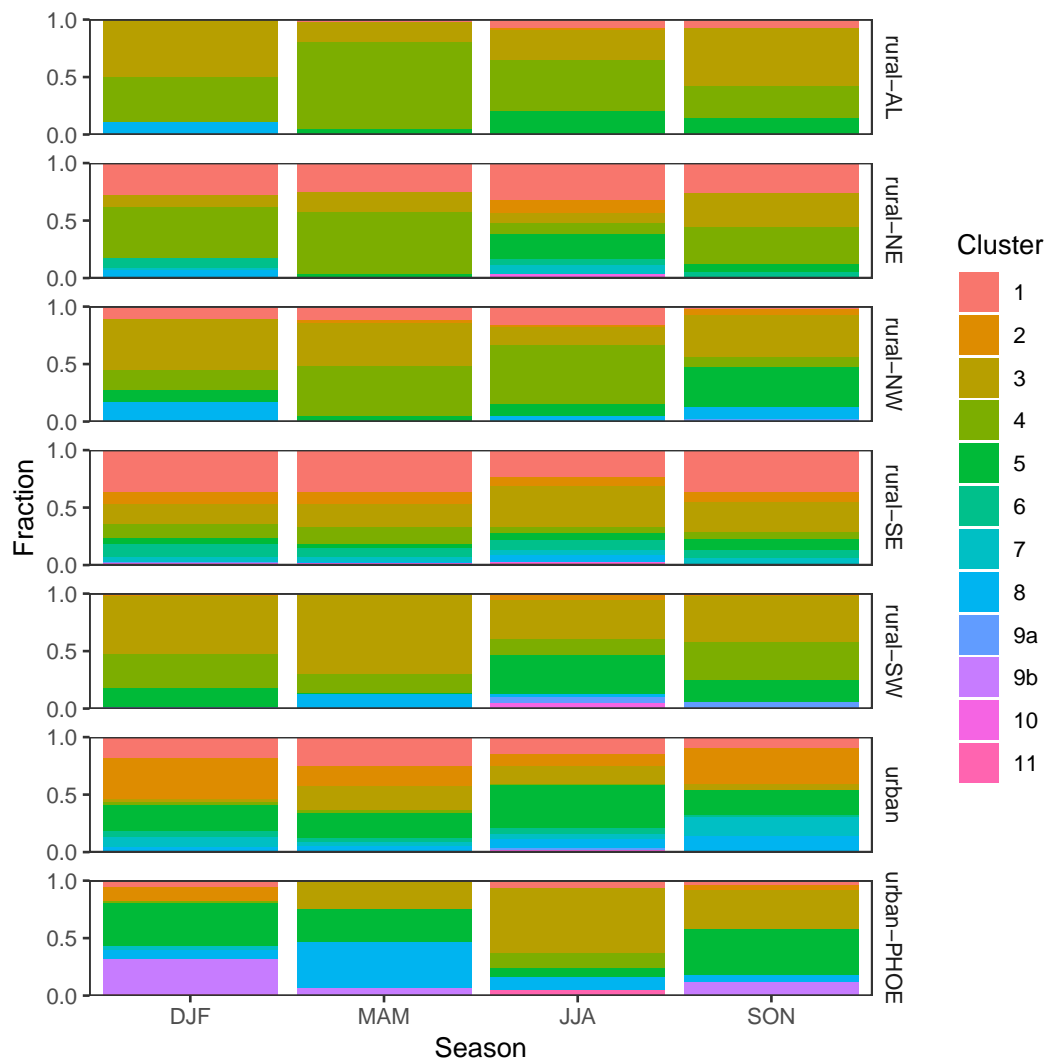

**Figure S13.** Frequency of clusters as fraction of samples at each site and season. “urban-PHOE” refers to Phoenix, AZ, and “urban” refers to all other urban sites.



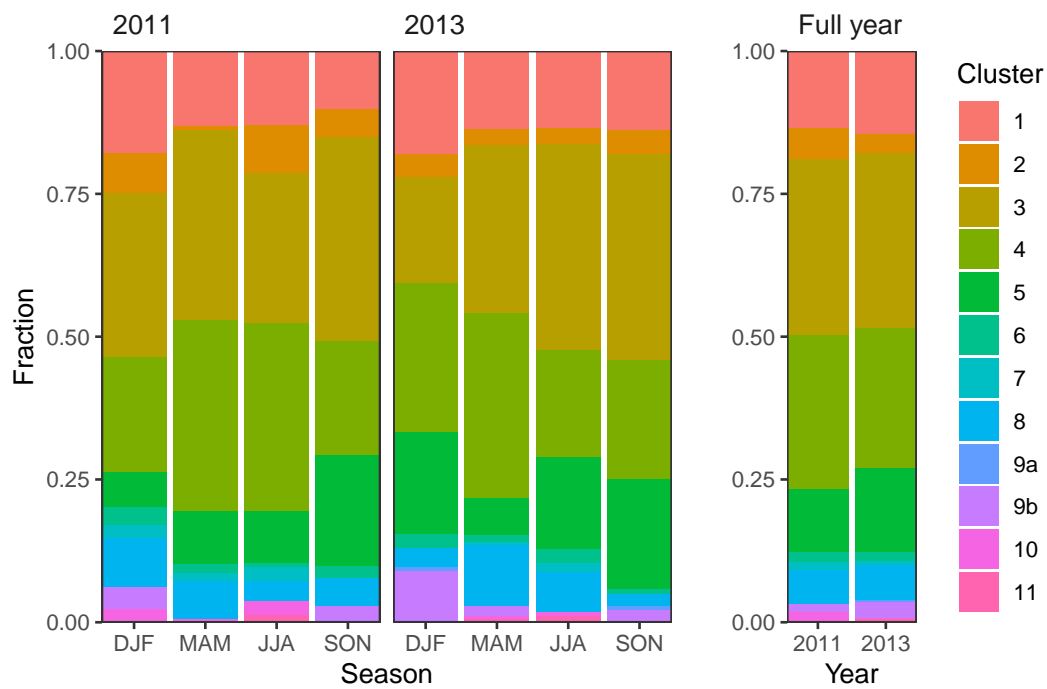

**Figure S14.** Frequency of clusters as fraction of samples during each year and season for six sites.

## References

- Allen, D. T., Palen, E. J., Haimov, M. I., Hering, S. V., and Young, J. R.: Fourier-transform Infrared-spectroscopy of Aerosol Collected In A Low-pressure Impactor (LPI/FTIR) - Method Development and Field Calibration, *Aerosol Science and Technology*, 21, 325–342, <https://doi.org/10.1080/02786829408959719>, 1994.
- Bishop, C. M.: *Pattern recognition and machine learning*, Springer, New York, NY, 2009.
- Chhabra, P. S., Ng, N. L., Canagaratna, M. R., Corrigan, A. L., Russell, L. M., Worsnop, D. R., Flagan, R. C., and Seinfeld, J. H.: Elemental composition and oxidation of chamber organic aerosol, *Atmospheric Chemistry and Physics*, 11, 8827–8845, <https://doi.org/10.5194/acp-11-8827-2011>, 2011.
- Day, D. A., Liu, S., Russell, L. M., and Ziemann, P. J.: Organonitrate group concentrations in submicron particles with high nitrate and organic fractions in coastal southern California, *Atmospheric Environment*, 44, 1970–1979, <https://doi.org/10.1016/j.atmosenv.2010.02.045>, 2010.
- Debus, B., Takahama, S., Weakley, A. T., Seibert, K., and Dillner, A. M.: Long-Term Strategy for Assessing Carbonaceous Particulate Matter Concentrations from Multiple Fourier Transform Infrared (FT-IR) Instruments: Influence of Spectral Dissimilarities on Multivariate Calibration Performance, *Applied Spectroscopy*, 73, 271–283, <https://doi.org/10.1177/0003702818804574>, 2019.
- Domingos, P.: A Few Useful Things to Know About Machine Learning, *Communications of the ACM*, 55, 78–87, <https://doi.org/10.1145/2347736.2347755>, 2012.
- Gelman, A. and Hill, J.: *Data Analysis Using Regression and Multilevel/Hierarchical Models*, Cambridge Univ. Press, Cambridge, 2007.
- Gelman, A., Carlin, J., Stern, H., Dunson, D., Vehtari, A., and Rubin, D.: *Bayesian Data Analysis*, Chapman & Hall/CRC Texts in Statistical Science, Chapman & Hall/CRC, New York, NY, 3rd edn., 2013.
- Hastie, T., Tibshirani, R., and Friedman, J.: *The elements of statistical learning: data mining, inference, and prediction*, Springer Verlag, New York, NY, 2009.
- Hoff, P. D.: *A First Course in Bayesian Statistical Methods*, Springer, New York, NY, <https://doi.org/10.1007/978-0-387-92407-6>, 2009.
- Jenkin, M. E., Saunders, S. M., and Pilling, M. J.: The tropospheric degradation of volatile organic compounds: a protocol for mechanism development, *Atmospheric Environment*, 31, 81–104, [https://doi.org/10.1016/S1352-2310\(96\)00105-7](https://doi.org/10.1016/S1352-2310(96)00105-7), 1997.
- Kuzmiakova, A., Dillner, A. M., and Takahama, S.: An automated baseline correction protocol for infrared spectra of atmospheric aerosols collected on polytetrafluoroethylene (Teflon) filters, *Atmospheric Measurement Techniques*, 9, 2615–2631, <https://doi.org/10.5194/amt-9-2615-2016>, 2016.
- Liu, S., Takahama, S., Russell, L. M., Gilardoni, S., and Baumgardner, D.: Oxygenated organic functional groups and their sources in single and submicron organic particles in MILAGRO 2006 campaign, *Atmospheric Chemistry and Physics*, 9, 6849–6863, <https://doi.org/10.5194/acp-9-6849-2009>, 2009.
- Reff, A., Turpin, B. J., Offenberg, J. H., Weisel, C. P., Zhang, J., Morandi, M., Stock, T., Colome, S., and Winer, A.: A functional group characterization of organic PM<sub>2.5</sub> exposure: Results from the RIOPA study RID C-3787-2009, *Atmospheric Environment*, 41, 4585–4598, <https://doi.org/10.1016/j.atmosenv.2007.03.054>, 2007.
- Robert, C. P.: *The Bayesian Choice: From Decision-Theoretic Foundations to Computational Implementation*, Springer Texts in Statistics, Springer, New York, NY, 2nd edn., 2007.
- Rogge, W. F., Hildemann, L. M., Mazurek, M. A., Cass, G. R., and Simoneit, B. R. T.: Sources of Fine Organic Aerosol .2. Non-catalyst and Catalyst-equipped Automobiles and Heavy-duty Diesel Trucks, *Environmental Science & Technology*, 27, 636–651, <https://doi.org/10.1021/es00041a007>, 1993.
- Rogge, W. F., Hildemann, L. M., Mazurek, M. A., Cass, G. R., and Simoneit, B. R. T.: Sources of fine organic aerosol. 9. Pine, oak and synthetic log combustion in residential fireplaces, *Environmental Science & Technology*, 32, 13–22, <https://doi.org/10.1021/es960930b>, 1998.
- Ruggeri, G. and Takahama, S.: Technical Note: Development of chemoinformatic tools to enumerate functional groups in molecules for organic aerosol characterization, *Atmospheric Chemistry and Physics*, 16, 4401–4422, <https://doi.org/10.5194/acp-16-4401-2016>, 2016.
- Russell, L. M.: Aerosol organic-mass-to-organic-carbon ratio measurements, *Environmental Science & Technology*, 37, 2982–2987, <https://doi.org/10.1021/es026123w>, 2003.
- Russell, L. M., Bahadur, R., Hawkins, L. N., Allan, J., Baumgardner, D., Quinn, P. K., and Bates, T. S.: Organic aerosol characterization by complementary measurements of chemical bonds and molecular fragments, *Atmospheric Environment*, 43, 6100–6105, <https://doi.org/10.1016/j.atmosenv.2009.09.036>, 2009.
- Ruthenburg, T. C., Perlin, P. C., Liu, V., McDade, C. E., and Dillner, A. M.: Determination of organic matter and organic matter to organic carbon ratios by infrared spectroscopy with application to selected sites in the IMPROVE network, *Atmospheric Environment*, 86, 47–57, <https://doi.org/10.1016/j.atmosenv.2013.12.034>, 2014.

- 120 Saunders, S. M., Jenkin, M. E., Derwent, R. G., and Pilling, M. J.: Protocol for the development of the Master Chemical Mechanism, MCM  
v3 (Part A): tropospheric degradation of non-aromatic volatile organic compounds, *Atmospheric Chemistry and Physics*, 3, 161–180,  
<https://doi.org/10.5194/acp-3-161-2003>, 2003.
- Takahama, S. and Ruggeri, G.: Technical note: Relating functional group measurements to carbon types for improved model–measurement  
comparisons of organic aerosol composition, *Atmospheric Chemistry and Physics*, 17, 4433–4450, [https://doi.org/10.5194/acp-17-4433-](https://doi.org/10.5194/acp-17-4433-2017)  
2017, 2017.
- 125 Vehtari, A. and Ojanen, J.: A survey of Bayesian predictive methods for model assessment, selection and comparison, *Statist. Surv.*, 6,  
142–228, <https://doi.org/10.1214/12-SS102>, 2012.
